# Supplementary material for: A computational study of the effect of the metal organic framework environment on the release of chemically stored nitric oxide
Source: Royal Society of Chemistry journal article supplement (doi:10.1039/c5cp02926k), 2015-01-01
Supplement: c5cp02926k1.pdf [file c5cp02926k1.pdf]

### Supporting Information

#### A computational study of the effect of the metal organic framework environment on the release of chemically stored nitric oxide

Tanping Li,<sup>1§</sup> Kiara Taylor-Edinbyrd,<sup>1§</sup> and Revati Kumar<sup>1,2\*</sup>

<sup>1</sup>Dept. of Chemistry, Louisiana State University, Baton Rouge, LA 70803

<sup>2</sup>Center for Computation and Technology, Louisiana State University, Baton Rouge, LA 70803

**Table S1.** Energies (relative to isomer III) and S-N distance of the various isomers, reactant and products (shown in Fig. 4 of the paper) at the B3LYP-D, M06, MP2 and CCSD(T) level of theory using a mixed basis set (LANLDZ for copper and 6-311G(d,p) for the other atoms). For the CCSD(T) energies, the CCSD optimized structures were used.

| Cluster      | CCSD(T)<br>$\Delta E$ (kcal/mol) | MP2<br>$\Delta E$ (kcal/mol) | B3LYP-D2 $\Delta E$<br>$\Delta E$ (kcal/mol) | M06 $\Delta E$<br>$\Delta E$ (kcal/mol) |
|--------------|----------------------------------|------------------------------|----------------------------------------------|-----------------------------------------|
| Reactant (I) | 39.4                             | 44.0                         | 53.1                                         | 50.6                                    |
| Product (II) | 25.0                             | 31.6                         | 29.2                                         | 33.1                                    |
| Isomer (III) | 0.0                              | 0.0                          | 0.0                                          | 0.0                                     |
| Isomer (IV)  | 7.2                              | 11.6                         | 9.7                                          | 9.2                                     |

| Cluster      | CCSD<br>$r_{S-N}$ (Å) | MP2<br>$r_{S-N}$ (Å) | B3LYP-<br>D2<br>$r_{S-N}$ (Å) | M06<br>$r_{S-N}$ (Å) |
|--------------|-----------------------|----------------------|-------------------------------|----------------------|
| Reactant (I) | 1.83                  | 1.84                 | 1.90                          | 1.85                 |
| Product (II) | N/A                   | N/A                  | N/A                           | N/A                  |
| Isomer (III) | 2.12                  | 2.26                 | 2.22                          | 2.18                 |
| Isomer (IV)  | 1.69                  | 1.66                 | 1.69                          | 1.68                 |

Additional canonical simulations (NVT ensemble) were performed at a temperature of 300 K using a Nose-Hoover thermostat for the CH<sub>3</sub>SNO case.<sup>1-3</sup> The box length was 26 Å. All bond lengths were constrained using the LINCS algorithm,<sup>4</sup> allowing a 2 fs time step in the simulation.

**Figure S1.** Free energy profiles of bringing CH<sub>3</sub>SNO1 and the subsequently CH<sub>3</sub>SNO2 to the same catalytic Cu(I) ion of MOF suspended in ethanol solution in the NVT ensemble. Error bars were obtained by block averaging.

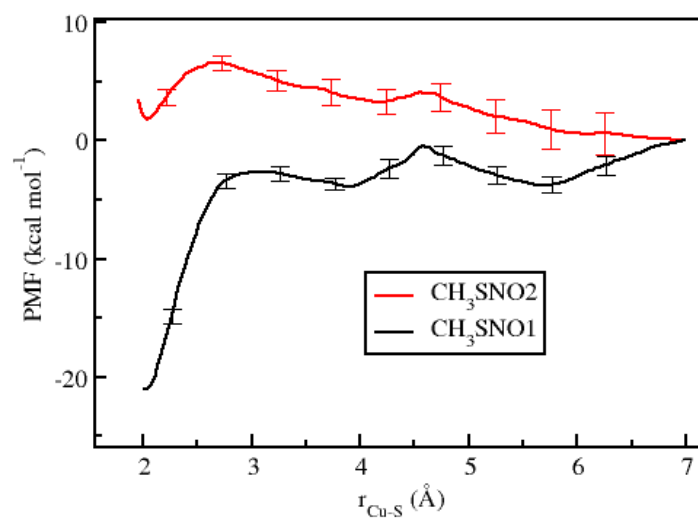

1. S. Nose, *Mol. Phys.*, 1984, **52**, 255-268.
2. S. Nose, *J. Chem. Phys.*, 1984, **81**, 511-519.
3. W. G. Hoover, *Physical Review A*, 1985, **31**, 1695-1697.
4. B. Hess, H. Bekker, H. J. C. Berendsen and J. G. E. M. Fraaije, *J. Comput. Chem.*, 1997, **18**, 1463-1472.
